# Supplementary material for: 1,8-Naphthalimide-based highly blue-emissive fluorophore induced by a bromine atom: reversible thermochromism and vapochromism characteristics
Source: Royal Society of Chemistry journal article supplement (doi:10.1039/c4ra12091d), 2014-11-19

## Electronic Supplementary Information (ESI)

### 1, 8-Naphthalimide-based highly blue-emissive fluorophore induced by bromine atom: reversible thermochromism and vapochromism characteristics

Zhao Chen, Di Wu, Xie Han, Yuting Nie, Jun Yin\*, Guang-Ao Yu, Sheng Hua Liu\*

Key Laboratory of Pesticide and Chemical Biology, Ministry of Education, College of  
Chemistry, Central China Normal University, Wuhan 430079, PR China

Tel: +86-27-67867725 Fax: +86-27-67867725

Corresponding author E-mail: yinj@mail.ccnu.edu.cn; chshliu@mail.ccnu.edu.cn

#### Contents

|                                                |     |
|------------------------------------------------|-----|
| 1. Experimental Section.....                   | S2  |
| 2. References.....                             | S4  |
| 3. Figs. S1.....                               | S4  |
| 4. Table S1-S4.....                            | S5  |
| 5. Copies of NMR spectra and Mass spectra..... | S10 |

## 1. Experimental Section

### Materials and measurements

The starting materials 1, 8-naphthalic anhydride, hexylamine, 6-amino-1-hexanol and hydrobromic acid 48% purchased from Alfa Aesar were used as received. ultra-pure water was used in the experiments. All other reagents were purchased as analytical-grade from Shen Shi Hua Gong Company (China) and used without further purification.  $^1\text{H}$  NMR (400 MHz) and  $^{13}\text{C}$  NMR (100.6 MHz) spectra were collected on American Varian Mercury Plus 400 spectrometer (400 MHz).  $^1\text{H}$  NMR spectra are reported as followed: chemical shift in ppm ( $\delta$ ) relative to the chemical shift of TMS at 0.00 ppm, integration, multiplicities (s=singlet, d=doublet, t=triplet, m=multiplet), and coupling constant (Hz).  $^{13}\text{C}$  NMR chemical shifts reported in ppm ( $\delta$ ) relative to the central line of triplet for  $\text{CDCl}_3$  at 77 ppm. EI-MS was obtained using Thermo scientific DSQ II. Elemental analyses (C, H, N) were performed by the Microanalytical Services, College of Chemistry, CCNU. UV-Vis spectra were obtained on U-3310 UV Spectrophotometer. Fluorescence spectra were recorded on a Fluoromax-P luminescence spectrometer (HORIBA JOBIN YVON INC.). the absolute fluorescence quantum yield was measured by Edinburgh Instruments FLS900. The X-ray crystal-structure determinations of compounds **1** and **2** were obtained on a Bruker APEX DUO CCD system.

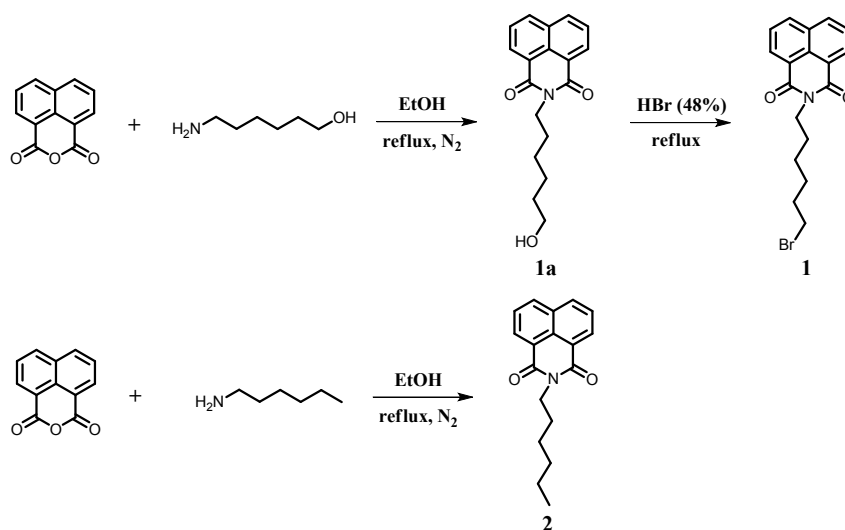

Scheme S1. Synthesis of the compounds **1** and **2**

## General procedure for the synthesis

Synthesis of **1a**: A mixture of 1, 8-naphthalic anhydride (10.1 mmol, 2.0 g), 6-amino-1-hexanol (11.1 mmol) were stirred in EtOH (50 ml) for 4 hours under an argon atmosphere at 78°C. After completion of present reaction, the mixture was extracted with dichloromethane (3×20 mL). The combined organic layers were washed with brine, dried (Na<sub>2</sub>SO<sub>4</sub>), and concentrated in vacuo. The residues were purified by column chromatography, affording the expected white solid product in a yield of 90.1%. <sup>1</sup>H NMR (400 MHz, CDCl<sub>3</sub>): δ (ppm)= 8.59 (d, J= 4 Hz, 2H), 8.20 (d, J= 8 Hz, 2H), 7.75 (t, J= 8 Hz, 2H), 4.18 (t, J= 8 Hz, 2H), 3.64 (d, J= 8 Hz, 2H), 1.87-1.59 (m, 5H), 1.46 (t, J= 4 Hz, 4H). <sup>13</sup>C NMR (100 MHz, CDCl<sub>3</sub>): δ (ppm)= 163.97, 133.70, 131.25, 130.96, 127.76, 126.71, 122.30, 62.48, 40.06, 32.43, 27.82, 26.57, 25.18. EI-MS: m/z= 297.30[M]<sup>+</sup>. Anal. Calcd. for C<sub>18</sub>H<sub>19</sub>NO<sub>3</sub>: C, 72.71; H, 6.44; N, 4.71. Found: C, 72.75; H, 6.40; N, 4.74.

Synthesis of **1**: A mixture of **1a** (6.7 mmol, 2.0 g), hydrobromic acid 48% (33.6 mmol) were stirred for 12 hours at 126°C. After completion of present reaction, the mixture was extracted with dichloromethane (3×20 mL). The combined organic layers were washed with brine, dried (Na<sub>2</sub>SO<sub>4</sub>), and concentrated in vacuo. The residues were purified by column chromatography, affording the expected white solid product in a yield of 87.0%. <sup>1</sup>H NMR (400 MHz, CDCl<sub>3</sub>): δ (ppm)= 8.60 (d, J= 8Hz, 2H), 8.22 (d, J= 8 Hz, 2H), 7.76 (t, J= 8 Hz, 2H), 4.19 (t, J= 8 Hz, 2H), 3.42 (t, J= 6 Hz, 2H), 1.92-1.85 (m, 2H), 1.80-1.72 (m, 2H), 1.54-1.44 (m, 4H). <sup>13</sup>C NMR (100 MHz, CDCl<sub>3</sub>): δ (ppm)= 164.11, 133.85, 131.46, 131.13, 128.02, 126.86, 122.55, 40.19, 33.86, 32.61, 27.83, 26.22. EI-MS: m/z= 359.24[M]<sup>+</sup>. Anal. Calcd. for C<sub>18</sub>H<sub>18</sub>BrNO<sub>2</sub>: C, 60.01; H, 5.04; N, 3.89. Found: C, 60.04; H, 5.00; N, 3.84.

Compounds **2** was prepared by procedures described in the corresponding literature.<sup>1</sup>

## Crystallographic Details

Single crystals of compounds **1** and **2** suitable for X-ray analysis were obtained by slow diffusion of *n*-hexane into a solution of dichloromethane containing small amounts of **1** and **2**. Crystals of **1** and **2** with approximate dimensions of  $0.10 \times 0.10 \times 0.10$  mm<sup>3</sup> for **1** and **2** were mounted on a glass fiber for diffraction experiment. Intensity data were collected on a Nonius Kappa CCD diffractometer with Mo K $\alpha$  radiation (0.71073 Å) at room temperature. The structures were solved by a combination of direct methods (SHELXS-97)<sup>2</sup> and Fourier difference techniques and refined by full-matrix least-squares (SHELXL-97)<sup>3</sup>. All non-H atoms were refined anisotropically. The hydrogen atoms were placed in the ideal positions and refined as riding atoms. Further crystal data of **1** and **2** are summarized in Table S1 and S2. Bond distances and angles of **1** and **2** are given in Table S3 and S4. Crystallographic data for compounds **1** and **2** in this paper have been deposited with the Cambridge Crystallographic Data Centre as supplemental publication CCDC 1014213 (compound **1**), CCDC 1014214 (compound **2**).

## 2. References

1. S. Asaoka, N. Takeda, T. Lyoda, A. R. Cook and J. R. Miller. *J. Am. Chem. Soc.* 2008; **130**: 11912.
2. G. M. Sheldrick, SHELXS-97: Program for crystal structure solution, University of Göttingen, Göttingen, Germany, **1997**.
3. G. M. Sheldrick, SHELXL-97: Program for crystal structure refinement, University of Göttingen, Göttingen, Germany, **1997**.

### 3. Fig. S1

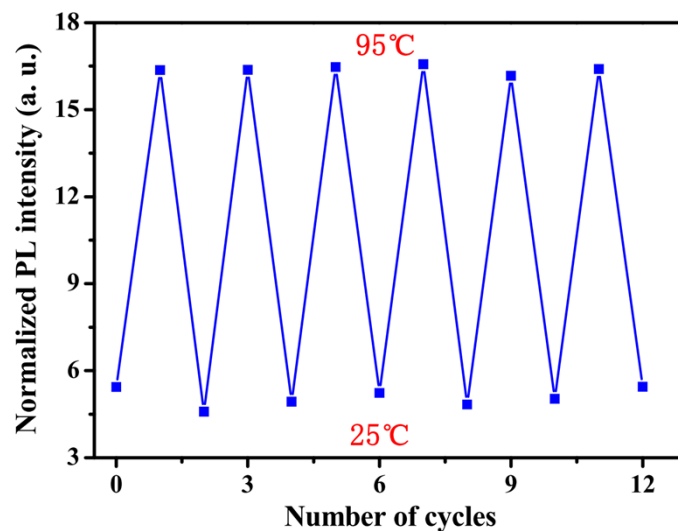

Fig. S1 Reversible temperature-dependence of the PL of 1 at 457 nm.

### 4. Table S1-S4

Table S1. Structure determination summary for the compound 1.

|                                            |                                                   |
|--------------------------------------------|---------------------------------------------------|
| Empirical formula                          | C <sub>18</sub> H <sub>18</sub> BrNO <sub>2</sub> |
| Formula weight                             | 360.24                                            |
| Temperature (K)                            | 298(2)                                            |
| Crystal system                             | Orthorhombic                                      |
| Space group                                | Pca2(1)                                           |
| <i>a</i> (Å)                               | 24.404(4)                                         |
| <i>b</i> (Å)                               | 4.7162(9)                                         |
| <i>c</i> (Å)                               | 14.206(3)                                         |
| $\alpha$ (deg)                             | 90                                                |
| $\beta$ (deg)                              | 90                                                |
| $\gamma$ (deg)                             | 90                                                |
| <i>V</i> (Å <sup>3</sup> )                 | 1635.1(5)                                         |
| <i>Z</i>                                   | 4                                                 |
| Absorption coefficient (mm <sup>-1</sup> ) | 2.520                                             |
| F (000)                                    | 736                                               |

|                                                           |                                                                  |
|-----------------------------------------------------------|------------------------------------------------------------------|
| Theta range for data collection (deg)                     | 2.20 to 31.59                                                    |
| Index ranges                                              | $-35 \leq h \leq 35$ , $-6 \leq k \leq 6$ , $-20 \leq l \leq 17$ |
| Reflections collected/unique                              | 16467/5002<br>( $R_{\text{int}} = 0.0428$ )                      |
| Final R indices [ $I > 2\sigma(I)$ ]                      | $R_1 = 0.0404$ , $wR_2 = 0.0976$                                 |
| R indices (all data)                                      | $R_1 = 0.0831$ , $wR_2 = 0.1118$                                 |
| Goodness-of-fit on $F^2$                                  | 0.972                                                            |
| Largest difference peak and hole ( $e \text{ \AA}^{-3}$ ) | 0.367, -0.431                                                    |

**Table S2.** Structure determination summary for the compound **2**.

|                                                           |                                                                    |
|-----------------------------------------------------------|--------------------------------------------------------------------|
| Empirical formula                                         | $C_{18} H_{19} NO_2$                                               |
| Formula weight                                            | 281.34                                                             |
| Temperature (K)                                           | 298(2)                                                             |
| Crystal system                                            | Monoclinic                                                         |
| Space group                                               | $P2(1)/n$                                                          |
| $a$ ( $\text{\AA}$ )                                      | 8.2418(14)                                                         |
| $b$ ( $\text{\AA}$ )                                      | 16.336(3)                                                          |
| $c$ ( $\text{\AA}$ )                                      | 11.3610(19)                                                        |
| $\alpha$ (deg)                                            | 90                                                                 |
| $\beta$ (deg)                                             | 103.266(3)                                                         |
| $\gamma$ (deg)                                            | 90                                                                 |
| $V$ ( $\text{\AA}^3$ )                                    | 1488.8(4)                                                          |
| $Z$                                                       | 4                                                                  |
| Absorption coefficient ( $\text{mm}^{-1}$ )               | 0.082                                                              |
| $F(000)$                                                  | 600                                                                |
| Theta range for data collection (deg)                     | 2.22 to 25.99                                                      |
| Index ranges                                              | $-10 \leq h \leq 10$ , $-20 \leq k \leq 20$ , $-13 \leq l \leq 14$ |
| Reflections collected/unique                              | 11160/2930<br>( $R_{\text{int}} = 0.0346$ )                        |
| Final R indices [ $I > 2\sigma(I)$ ]                      | $R_1 = 0.0569$ , $wR_2 = 0.1592$                                   |
| R indices (all data)                                      | $R_1 = 0.0689$ , $wR_2 = 0.1744$                                   |
| Goodness-of-fit on $F^2$                                  | 1.036                                                              |
| Largest difference peak and hole ( $e \text{ \AA}^{-3}$ ) | 0.625, -0.295                                                      |

**Table S3.** Bond lengths [ $\text{\AA}$ ] and angles [ $^\circ$ ] of **1**.

|              |          |                  |          |
|--------------|----------|------------------|----------|
| Br(1)-C(18)  | 1.948(3) | C(16)-H(16B)     | 0.9700   |
| C(1)-O(1)    | 1.206(3) | C(17)-C(18)      | 1.495(4) |
| C(1)-N(1)    | 1.398(4) | C(17)-H(17A)     | 0.9700   |
| C(1)-C(2)    | 1.481(4) | C(17)-H(17B)     | 0.9700   |
| C(2)-C(3)    | 1.362(4) | C(18)-H(18A)     | 0.9700   |
| C(2)-C(12)   | 1.405(4) | C(18)-H(18B)     | 0.9700   |
| C(3)-C(4)    | 1.404(5) |                  |          |
| C(3)-H(3)    | 0.9300   | O(1)-C(1)-N(1)   | 120.0(3) |
| C(4)-C(5)    | 1.355(5) | O(1)-C(1)-C(2)   | 123.1(3) |
| C(4)-H(4)    | 0.9300   | N(1)-C(1)-C(2)   | 116.9(2) |
| C(5)-C(6)    | 1.411(4) | C(3)-C(2)-C(12)  | 120.2(3) |
| C(5)-H(5)    | 0.9300   | C(3)-C(2)-C(1)   | 119.7(3) |
| C(6)-C(7)    | 1.416(4) | C(12)-C(2)-C(1)  | 120.2(2) |
| C(6)-C(12)   | 1.421(4) | C(2)-C(3)-C(4)   | 120.2(3) |
| C(7)-C(8)    | 1.353(5) | C(2)-C(3)-H(3)   | 119.9    |
| C(7)-H(7)    | 0.9300   | C(4)-C(3)-H(3)   | 119.9    |
| C(8)-C(9)    | 1.393(4) | C(5)-C(4)-C(3)   | 121.0(3) |
| C(8)-H(8)    | 0.9300   | C(5)-C(4)-H(4)   | 119.5    |
| C(9)-C(10)   | 1.379(4) | C(3)-C(4)-H(4)   | 119.5    |
| C(9)-H(9)    | 0.9300   | C(4)-C(5)-C(6)   | 120.6(3) |
| C(10)-C(12)  | 1.408(4) | C(4)-C(5)-H(5)   | 119.7    |
| C(10)-C(11)  | 1.475(3) | C(6)-C(5)-H(5)   | 119.7    |
| C(11)-O(2)   | 1.213(3) | C(5)-C(6)-C(7)   | 123.4(3) |
| C(11)-N(1)   | 1.399(4) | C(5)-C(6)-C(12)  | 118.2(3) |
| C(13)-N(1)   | 1.468(3) | C(7)-C(6)-C(12)  | 118.4(2) |
| C(13)-C(14)  | 1.512(4) | C(8)-C(7)-C(6)   | 121.1(3) |
| C(13)-H(13A) | 0.9700   | C(8)-C(7)-H(7)   | 119.5    |
| C(13)-H(13B) | 0.9700   | C(6)-C(7)-H(7)   | 119.5    |
| C(14)-C(15)  | 1.520(4) | C(7)-C(8)-C(9)   | 120.6(3) |
| C(14)-H(14A) | 0.9700   | C(7)-C(8)-H(8)   | 119.7    |
| C(14)-H(14B) | 0.9700   | C(9)-C(8)-H(8)   | 119.7    |
| C(15)-C(16)  | 1.525(4) | C(10)-C(9)-C(8)  | 120.7(3) |
| C(15)-H(15A) | 0.9700   | C(10)-C(9)-H(9)  | 119.7    |
| C(15)-H(15B) | 0.9700   | C(8)-C(9)-H(9)   | 119.7    |
| C(16)-C(17)  | 1.510(4) | C(9)-C(10)-C(12) | 119.8(2) |
| C(16)-H(16A) | 0.9700   | C(9)-C(10)-C(11) | 119.8(2) |

|                     |          |                     |          |
|---------------------|----------|---------------------|----------|
| C(12)-C(10)-C(11)   | 120.4(2) | C(16)-C(15)-H(15B)  | 109.0    |
| O(2)-C(11)-N(1)     | 120.4(2) | H(15A)-C(15)-H(15B) | 107.8    |
| O(2)-C(11)-C(10)    | 122.7(2) | C(17)-C(16)-C(15)   | 112.5(2) |
| N(1)-C(11)-C(10)    | 116.9(2) | C(17)-C(16)-H(16A)  | 109.1    |
| C(2)-C(12)-C(10)    | 120.8(2) | C(15)-C(16)-H(16A)  | 109.1    |
| C(2)-C(12)-C(6)     | 119.8(2) | C(17)-C(16)-H(16B)  | 109.1    |
| C(10)-C(12)-C(6)    | 119.4(2) | C(15)-C(16)-H(16B)  | 109.1    |
| N(1)-C(13)-C(14)    | 111.7(2) | H(16A)-C(16)-H(16B) | 107.8    |
| N(1)-C(13)-H(13A)   | 109.3    | C(18)-C(17)-C(16)   | 115.3(3) |
| C(14)-C(13)-H(13A)  | 109.3    | C(18)-C(17)-H(17A)  | 108.5    |
| N(1)-C(13)-H(13B)   | 109.3    | C(16)-C(17)-H(17A)  | 108.5    |
| C(14)-C(13)-H(13B)  | 109.3    | C(18)-C(17)-H(17B)  | 108.5    |
| H(13A)-C(13)-H(13B) | 107.9    | C(16)-C(17)-H(17B)  | 108.5    |
| C(13)-C(14)-C(15)   | 112.7(2) | H(17A)-C(17)-H(17B) | 107.5    |
| C(13)-C(14)-H(14A)  | 109.1    | C(17)-C(18)-Br(1)   | 112.8(2) |
| C(15)-C(14)-H(14A)  | 109.1    | C(17)-C(18)-H(18A)  | 109.0    |
| C(13)-C(14)-H(14B)  | 109.1    | Br(1)-C(18)-H(18A)  | 109.0    |
| C(15)-C(14)-H(14B)  | 109.1    | C(17)-C(18)-H(18B)  | 109.0    |
| H(14A)-C(14)-H(14B) | 107.8    | Br(1)-C(18)-H(18B)  | 109.0    |
| C(14)-C(15)-C(16)   | 113.1(2) | H(18A)-C(18)-H(18B) | 107.8    |
| C(14)-C(15)-H(15A)  | 109.0    | C(1)-N(1)-C(11)     | 124.8(2) |
| C(16)-C(15)-H(15A)  | 109.0    | C(1)-N(1)-C(13)     | 118.0(2) |
| C(14)-C(15)-H(15B)  | 109.0    | C(11)-N(1)-C(13)    | 117.0(2) |

**Table S4.** Bond lengths [Å] and angles [°] of **2**.

|           |          |             |          |
|-----------|----------|-------------|----------|
| C(1)-O(1) | 1.215(2) | C(6)-C(11)  | 1.413(3) |
| C(1)-N(1) | 1.393(2) | C(6)-C(7)   | 1.417(2) |
| C(1)-C(2) | 1.472(2) | C(7)-C(8)   | 1.406(2) |
| C(2)-C(3) | 1.373(3) | C(8)-C(9)   | 1.378(2) |
| C(2)-C(7) | 1.413(2) | C(8)-C(12)  | 1.474(3) |
| C(3)-C(4) | 1.407(3) | C(9)-C(10)  | 1.403(3) |
| C(3)-H(3) | 0.9300   | C(9)-H(9)   | 0.9300   |
| C(4)-C(5) | 1.355(3) | C(10)-C(11) | 1.356(3) |
| C(4)-H(4) | 0.9300   | C(10)-H(10) | 0.9300   |
| C(5)-C(6) | 1.411(3) | C(11)-H(11) | 0.9300   |
| C(5)-H(5) | 0.9300   | C(12)-O(2)  | 1.214(2) |



|                 |            |                     |            |
|-----------------|------------|---------------------|------------|
| C(12)-N(1)      | 1.398(2)   | C(11)-C(6)-C(7)     | 117.96(19) |
| C(13)-N(1)      | 1.476(2)   | C(8)-C(7)-C(2)      | 120.68(15) |
| C(13)-C(14)     | 1.502(3)   | C(8)-C(7)-C(6)      | 119.99(16) |
| C(13)-H(13A)    | 0.9700     | C(2)-C(7)-C(6)      | 119.32(17) |
| C(13)-H(13B)    | 0.9700     | C(9)-C(8)-C(7)      | 120.28(17) |
| C(14)-C(15)     | 1.523(3)   | C(9)-C(8)-C(12)     | 119.46(17) |
| C(14)-H(14A)    | 0.9700     | C(7)-C(8)-C(12)     | 120.26(15) |
| C(14)-H(14B)    | 0.9700     | C(8)-C(9)-C(10)     | 119.6(2)   |
| C(15)-C(16)     | 1.542(3)   | C(8)-C(9)-H(9)      | 120.2      |
| C(15)-H(15A)    | 0.9700     | C(10)-C(9)-H(9)     | 120.2      |
| C(15)-H(15B)    | 0.9700     | C(11)-C(10)-C(9)    | 120.96(19) |
| C(16)-C(17)     | 1.493(3)   | C(11)-C(10)-H(10)   | 119.5      |
| C(16)-H(16A)    | 0.9700     | C(9)-C(10)-H(10)    | 119.5      |
| C(16)-H(16B)    | 0.9700     | C(10)-C(11)-C(6)    | 121.17(19) |
| C(17)-C(18)     | 1.493(3)   | C(10)-C(11)-H(11)   | 119.4      |
| C(17)-H(17A)    | 0.9700     | C(6)-C(11)-H(11)    | 119.4      |
| C(17)-H(17B)    | 0.9700     | O(2)-C(12)-N(1)     | 120.01(17) |
| C(18)-H(18A)    | 0.9600     | O(2)-C(12)-C(8)     | 123.17(17) |
| C(18)-H(18B)    | 0.9600     | N(1)-C(12)-C(8)     | 116.81(15) |
| C(18)-H(18C)    | 0.9600     | N(1)-C(13)-C(14)    | 112.10(16) |
|                 |            | N(1)-C(13)-H(13A)   | 109.2      |
| O(1)-C(1)-N(1)  | 120.17(16) | C(14)-C(13)-H(13A)  | 109.2      |
| O(1)-C(1)-C(2)  | 122.70(17) | N(1)-C(13)-H(13B)   | 109.2      |
| N(1)-C(1)-C(2)  | 117.12(15) | C(14)-C(13)-H(13B)  | 109.2      |
| C(3)-C(2)-C(7)  | 120.02(16) | H(13A)-C(13)-H(13B) | 107.9      |
| C(3)-C(2)-C(1)  | 119.96(16) | C(13)-C(14)-C(15)   | 112.45(17) |
| C(7)-C(2)-C(1)  | 120.02(16) | C(13)-C(14)-H(14A)  | 109.1      |
| C(2)-C(3)-C(4)  | 120.31(19) | C(15)-C(14)-H(14A)  | 109.1      |
| C(2)-C(3)-H(3)  | 119.8      | C(13)-C(14)-H(14B)  | 109.1      |
| C(4)-C(3)-H(3)  | 119.8      | C(15)-C(14)-H(14B)  | 109.1      |
| C(5)-C(4)-C(3)  | 120.64(19) | H(14A)-C(14)-H(14B) | 107.8      |
| C(5)-C(4)-H(4)  | 119.7      | C(14)-C(15)-C(16)   | 111.89(17) |
| C(3)-C(4)-H(4)  | 119.7      | C(14)-C(15)-H(15A)  | 109.2      |
| C(4)-C(5)-C(6)  | 120.81(18) | C(16)-C(15)-H(15A)  | 109.2      |
| C(4)-C(5)-H(5)  | 119.6      | C(14)-C(15)-H(15B)  | 109.2      |
| C(6)-C(5)-H(5)  | 119.6      | C(16)-C(15)-H(15B)  | 109.2      |
| C(5)-C(6)-C(11) | 123.14(18) | H(15A)-C(15)-H(15B) | 107.9      |
| C(5)-C(6)-C(7)  | 118.90(18) | C(17)-C(16)-C(15)   | 114.96(18) |

|                     |          |                     |            |
|---------------------|----------|---------------------|------------|
| C(17)-C(16)-H(16A)  | 108.5    | H(17A)-C(17)-H(17B) | 107.8      |
| C(15)-C(16)-H(16A)  | 108.5    | C(17)-C(18)-H(18A)  | 109.5      |
| C(17)-C(16)-H(16B)  | 108.5    | C(17)-C(18)-H(18B)  | 109.5      |
| C(15)-C(16)-H(16B)  | 108.5    | H(18A)-C(18)-H(18B) | 109.5      |
| H(16A)-C(16)-H(16B) | 107.5    | C(17)-C(18)-H(18C)  | 109.5      |
| C(18)-C(17)-C(16)   | 112.7(2) | H(18A)-C(18)-H(18C) | 109.5      |
| C(18)-C(17)-H(17A)  | 109.0    | H(18B)-C(18)-H(18C) | 109.5      |
| C(16)-C(17)-H(17A)  | 109.0    | C(1)-N(1)-C(12)     | 124.96(14) |
| C(18)-C(17)-H(17B)  | 109.0    | C(1)-N(1)-C(13)     | 118.38(15) |
| C(16)-C(17)-H(17B)  | 109.0    | C(12)-N(1)-C(13)    | 116.61(15) |

## 5. Copies of NMR spectra and Mass spectra

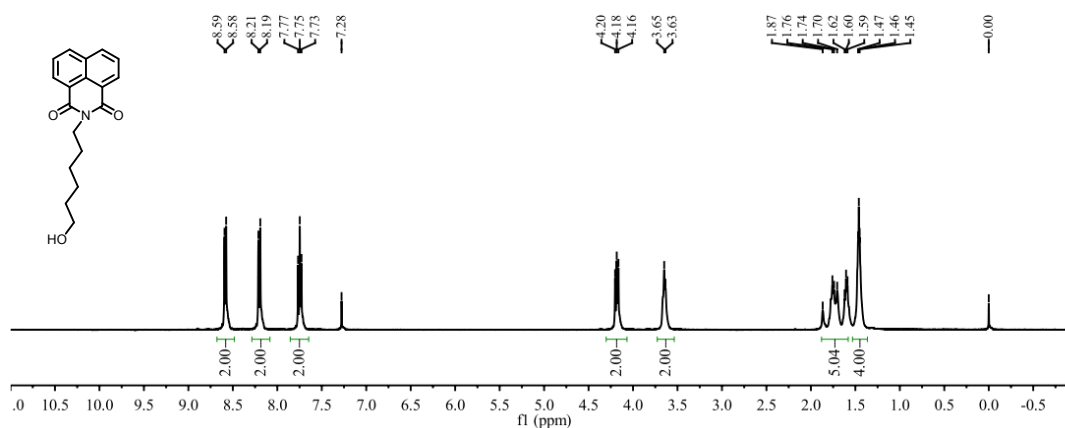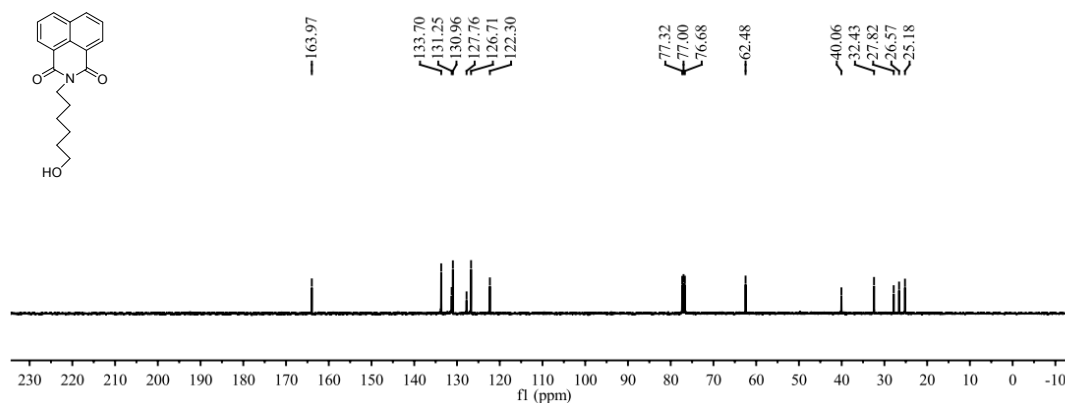

CZ299 #558 RT: 2.60 AV: 1 SB: 430 0.72-2.28 , 2.92-3.33 NL: 3.05E5  
 T: + cFull.ms [40.00-500.00]

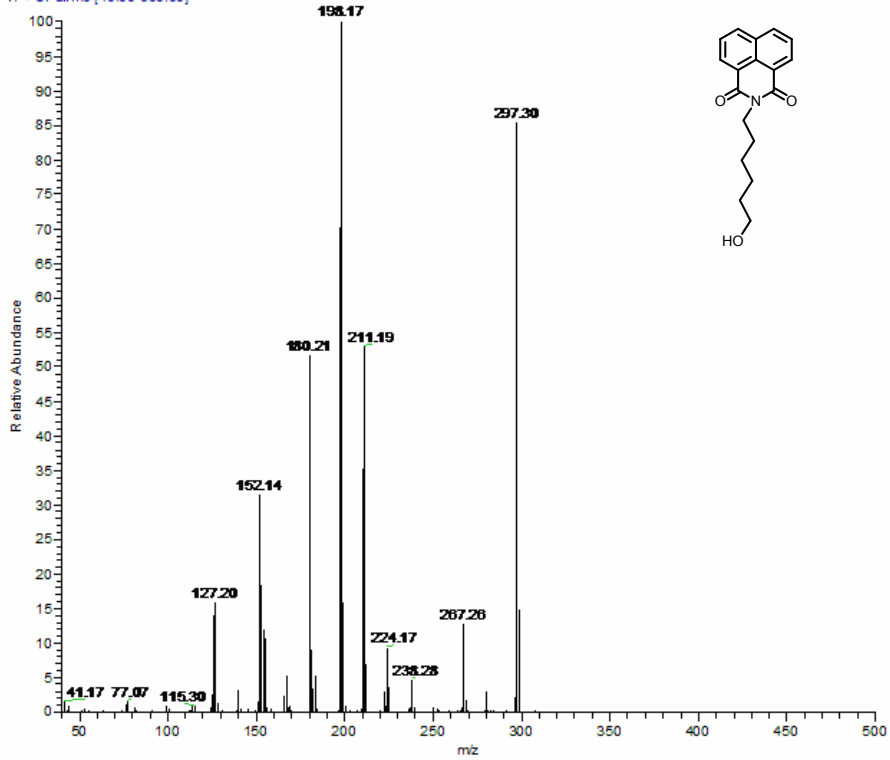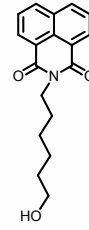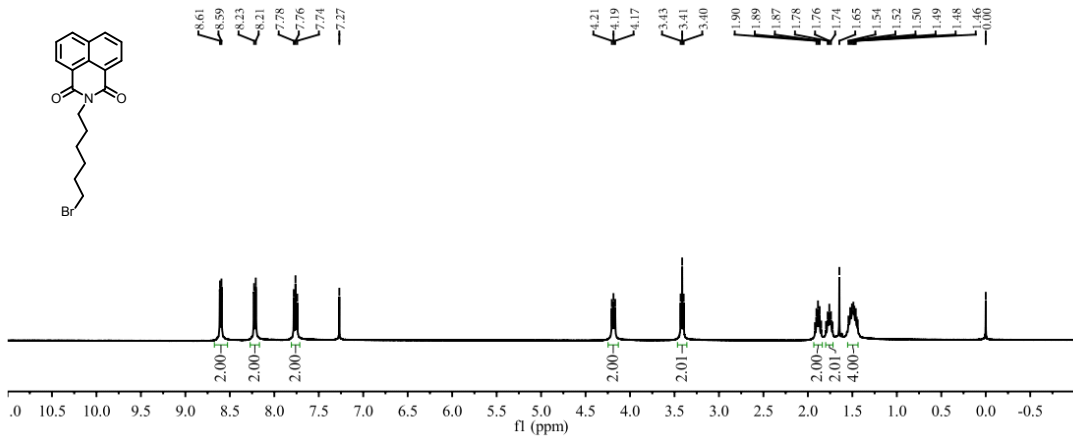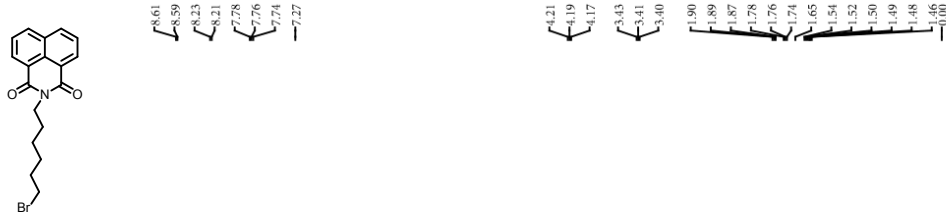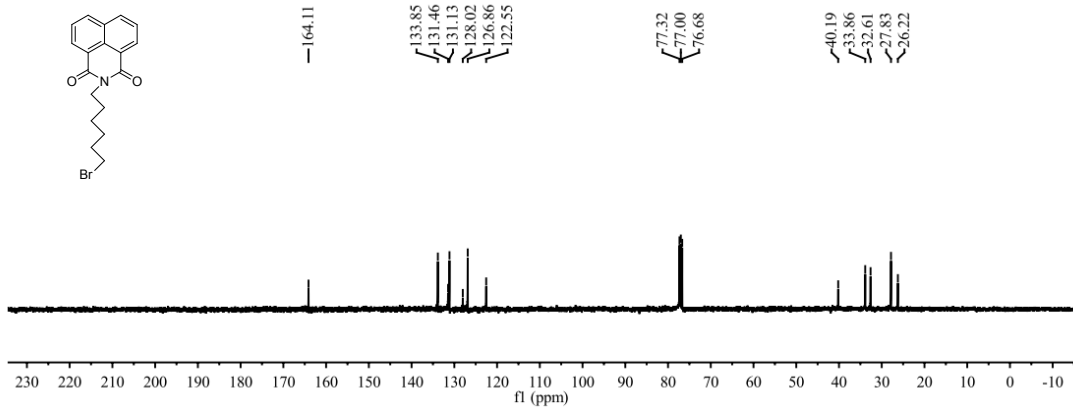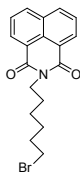

CZ294 #472 RT: 2.21 AV: 1 SB: 475 0.18-1.94, 2.38-2.80 NL: 3.32E5  
T: + cFullms [40.00-500.00]

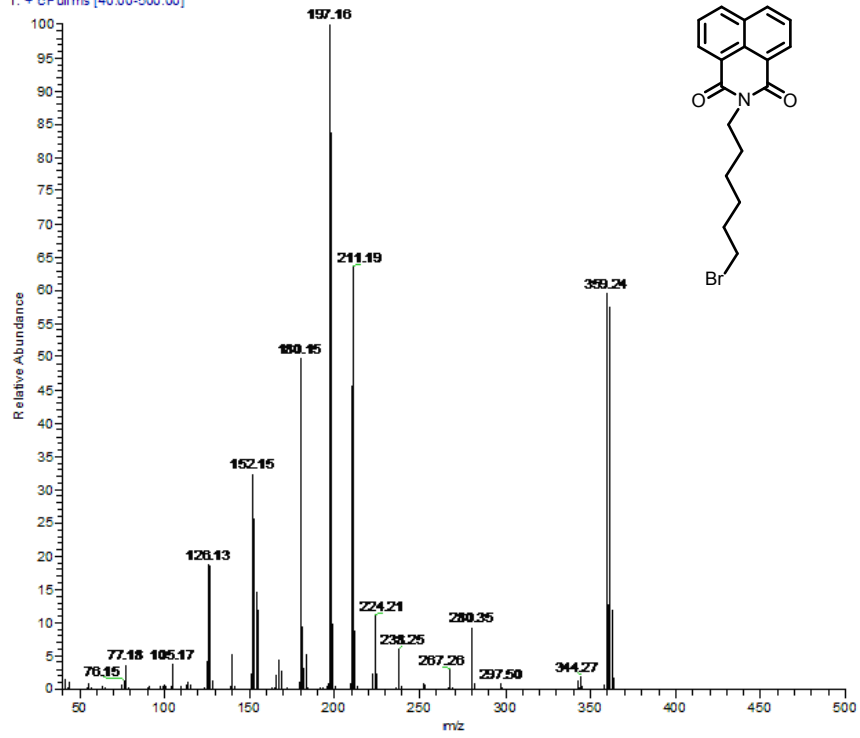

Supplement: c4ra12091d1.pdf [file c4ra12091d1.pdf]
